# Supplementary material for: DoE-based medium optimization for improved biosurfactant production with Aureobasidium pullulans
Source: PubMed Central journal article supplement (PMC10953688; doi:10.3389/fbioe.2024.1379707), 2024-03-06
Supplement: DataSheet1.pdf [file DataSheet1.pdf]

## Supplementary Material

### DoE-based medium optimization for improved biosurfactant production with *Aureobasidium pullulans*

Frederick Haala<sup>1</sup>, Marie R. E. Dielentheis-Frenken<sup>1</sup>, Friedrich M. Brandt<sup>1</sup>, Tobias Karmainski<sup>1</sup>, Lars M. Blank<sup>1</sup>, Till Tiso<sup>1\*</sup>

<sup>1</sup>Institute of Applied Microbiology, RWTH Aachen University, Aachen, Germany

\* **Correspondence:**

Corresponding Author

till.tiso@rwth-aachen.de

#### 1 Supplementary

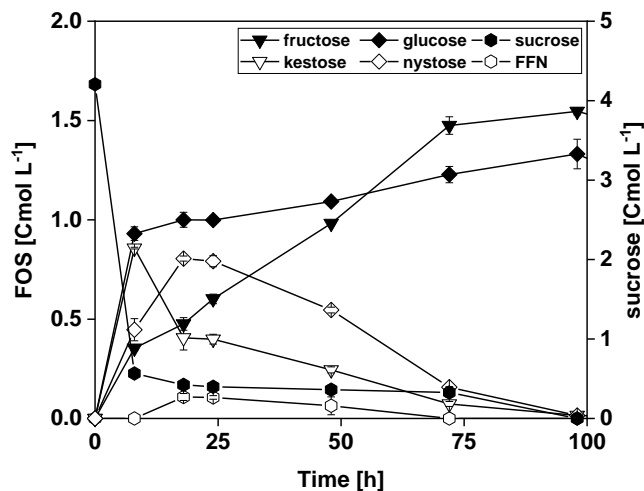

**Figure S1: Fructooligosaccharide (FOS) formation and depletion using sucrose as carbon source:** Concentration of sucrose, kestose, nystose, and fructofuranosylnystose (FFN) and their monomers glucose and fructose in the first 100 hours. Cultivations were performed with *A. pullulans* NRRL 62042 in 24 deep-well microtiter plates with 2 mL filling volume, 30 °C, and 300 rpm. Data show the mean of biological triplicates with  $\pm$  standard deviation.

**Table S1:** Two-level factorial design plan of experiments with factors C/N ratio, vitamin (vit.) solution, trace-element (TE) solution,  $K_2HPO_4$ ,  $MgSO_4 \times 7 H_2O$ ,  $MgSO_4$ , NaCl, Glucose, and the response polyol lipid titer.

| Run | C:N ratio              | Vit.-Sol.             | TE-Sol.               | $K_2HPO_4$           | $MgSO_4 \times 7 H_2O$ | NaCl                 | Glucose              | Polyol lipid         |
|-----|------------------------|-----------------------|-----------------------|----------------------|------------------------|----------------------|----------------------|----------------------|
|     | [gC gN <sup>-1</sup> ] | [ml L <sup>-1</sup> ] | [ml L <sup>-1</sup> ] | [g L <sup>-1</sup> ] | [g L <sup>-1</sup> ]   | [g L <sup>-1</sup> ] | [g L <sup>-1</sup> ] | [g L <sup>-1</sup> ] |
| 1   | 200                    | 0.5                   | 5                     | 0.5                  | 2                      | 0.5                  | 150                  | 28                   |
| 2   | 50                     | 2                     | 15                    | 2                    | 2                      | 0.5                  | 50                   | 7.95                 |
| 3   | 50                     | 0.5                   | 15                    | 0.5                  | 0.5                    | 0.5                  | 50                   | 9.45                 |
| 4   | 50                     | 2                     | 5                     | 2                    | 2                      | 2                    | 150                  | 27.05                |
| 5   | 50                     | 2                     | 15                    | 0.5                  | 0.5                    | 2                    | 150                  | 18                   |
| 6   | 200                    | 2                     | 5                     | 2                    | 2                      | 0.5                  | 50                   | 5.75                 |
| 7   | 200                    | 2                     | 15                    | 2                    | 0.5                    | 2                    | 50                   | 6.6                  |
| 8   | 50                     | 2                     | 15                    | 0.5                  | 2                      | 2                    | 50                   | 8.3                  |
| 9   | 50                     | 2                     | 5                     | 0.5                  | 2                      | 0.5                  | 150                  | 21.85                |
| 10  | 200                    | 2                     | 15                    | 2                    | 2                      | 2                    | 150                  | 27.9                 |
| 11  | 200                    | 0.5                   | 5                     | 0.5                  | 0.5                    | 0.5                  | 50                   | 9.5                  |
| 12  | 50                     | 0.5                   | 5                     | 2                    | 2                      | 0.5                  | 50                   | 8                    |
| 13  | 50                     | 2                     | 5                     | 0.5                  | 0.5                    | 0.5                  | 50                   | 7.95                 |
| 14  | 200                    | 2                     | 5                     | 2                    | 0.5                    | 0.5                  | 150                  | 32.65                |
| 15  | 50                     | 2                     | 15                    | 2                    | 0.5                    | 0.5                  | 150                  | 25.95                |
| 16  | 200                    | 0.5                   | 15                    | 0.5                  | 0.5                    | 2                    | 150                  | 25.7                 |
| 17  | 50                     | 2                     | 5                     | 2                    | 0.5                    | 2                    | 50                   | 7.1                  |
| 18  | 50                     | 0.5                   | 15                    | 2                    | 2                      | 2                    | 150                  | 29.75                |
| 19  | 200                    | 0.5                   | 5                     | 2                    | 0.5                    | 2                    | 50                   | 8.85                 |
| 20  | 125                    | 1.25                  | 10                    | 1.25                 | 1.25                   | 1.25                 | 100                  | 22.9                 |
| 21  | 50                     | 0.5                   | 5                     | 2                    | 0.5                    | 0.5                  | 150                  | 31.6                 |
| 22  | 200                    | 2                     | 5                     | 0.5                  | 2                      | 2                    | 50                   | 9.4                  |

|           |     |      |    |      |      |      |     |       |
|-----------|-----|------|----|------|------|------|-----|-------|
| <b>23</b> | 200 | 2    | 15 | 0.5  | 2    | 0.5  | 150 | 29.35 |
| <b>24</b> | 200 | 2    | 15 | 0.5  | 0.5  | 0.5  | 50  | 7.3   |
| <b>25</b> | 200 | 0.5  | 15 | 2    | 2    | 0.5  | 50  | 7.9   |
| <b>26</b> | 200 | 2    | 5  | 0.5  | 0.5  | 2    | 150 | 25.85 |
| <b>27</b> | 125 | 1.25 | 10 | 1.25 | 1.25 | 1.25 | 100 | 20.5  |
| <b>28</b> | 50  | 0.5  | 15 | 2    | 0.5  | 2    | 50  | 6.65  |
| <b>29</b> | 125 | 1.25 | 10 | 1.25 | 1.25 | 1.25 | 100 | 20.7  |
| <b>30</b> | 50  | 0.5  | 5  | 0.5  | 0.5  | 2    | 150 | 23.8  |
| <b>31</b> | 50  | 0.5  | 15 | 0.5  | 2    | 0.5  | 150 | 19.1  |
| <b>32</b> | 200 | 0.5  | 15 | 2    | 0.5  | 0.5  | 150 | 29.3  |
| <b>33</b> | 200 | 0.5  | 15 | 0.5  | 2    | 2    | 50  | 8.7   |
| <b>34</b> | 125 | 1.25 | 10 | 1.25 | 1.25 | 1.25 | 100 | 20.05 |
| <b>35</b> | 50  | 0.5  | 5  | 0.5  | 2    | 2    | 50  | 8     |
| <b>36</b> | 200 | 0.5  | 5  | 2    | 2    | 2    | 150 | 26.15 |

**Table S2** ANOVA analysis from two-level factorial design with the factors carbon-to-nitrogen ratio C/N ( $\text{g}_{\text{carbon}} \text{g}_{\text{nitrogen}}^{-1}$ ), vitamin and trace-element solution,  $\text{K}_2\text{HPO}_4$ ,  $\text{MgSO}_4 \times 7 \text{H}_2\text{O}$ , NaCl, and glucose.

| <b>Factor</b>                                                     | <b>Sum of squares</b> | <b>Degrees of freedom</b> | <b>Mean square</b> | <b>F-value</b> | <b>p-value</b> |
|-------------------------------------------------------------------|-----------------------|---------------------------|--------------------|----------------|----------------|
| <b>Model</b>                                                      | 2,981.05              | 26                        | 114.66             | 17.50          | < 0.0001       |
| <b>C/N ratio (A)</b>                                              | 25.20                 | 1                         | 25.20              | 3.85           | 0.0815         |
| <b>Vit.-solution (B)</b>                                          | 4.13                  | 1                         | 4.13               | 0.6308         | 0.4475         |
| <b>TE-solution (C)</b>                                            | 5.78                  | 1                         | 5.78               | 0.8823         | 0.3721         |
| <b><math>\text{K}_2\text{HPO}_4</math> (D)</b>                    | 26.10                 | 1                         | 26.10              | 3.98           | 0.0771         |
| <b><math>\text{MgSO}_4 \times 7 \text{H}_2\text{O}</math> (E)</b> | 0.3003                | 1                         | 0.3003             | 0.0458         | 0.8352         |
| <b>NaCl</b>                                                       | 5.95                  | 1                         | 5.95               | 0.9084         | 0.3654         |
| <b>Glucose (F)</b>                                                | 2,712.16              | 1                         | 2,712.16           | 413.98         | < 0.0001       |
| <b>AB</b>                                                         | 5.20                  | 1                         | 5.20               | 0.7938         | 0.3962         |
| <b>AC</b>                                                         | 1.45                  | 1                         | 1.45               | 0.2206         | 0.6498         |

|                    |        |   |        |        |        |
|--------------------|--------|---|--------|--------|--------|
| <b>AD</b>          | 21.62  | 1 | 21.62  | 3.30   | 0.1027 |
| <b>AE</b>          | 0.1378 | 1 | 0.1378 | 0.0210 | 0.8879 |
| <b>AF</b>          | 1.71   | 1 | 1.71   | 0.2612 | 0.6216 |
| <b>AG</b>          | 23.12  | 1 | 23.12  | 3.53   | 0.0930 |
| <b>BD</b>          | 0.2813 | 1 | 0.2813 | 0.0429 | 0.8405 |
| <b>BE</b>          | 7.41   | 1 | 7.41   | 1.13   | 0.3152 |
| <b>BF</b>          | 0.3403 | 1 | 0.3403 | 0.0519 | 0.8248 |
| <b>CD</b>          | 0.3403 | 1 | 0.3403 | 0.0519 | 0.8248 |
| <b>CE</b>          | 16.68  | 1 | 16.68  | 2.55   | 0.1451 |
| <b>CF</b>          | 0.6050 | 1 | 0.6050 | 0.0923 | 0.7681 |
| <b>CG</b>          | 3.25   | 1 | 3.25   | 0.4963 | 0.4990 |
| <b>DE</b>          | 5.61   | 1 | 5.61   | 0.8565 | 0.3789 |
| <b>DG</b>          | 73.51  | 1 | 73.51  | 11.22  | 0.0085 |
| <b>ADE</b>         | 12.75  | 1 | 12.75  | 1.95   | 0.1964 |
| <b>ADG</b>         | 16.10  | 1 | 16.10  | 2.46   | 0.1514 |
| <b>BDE</b>         | 5.70   | 1 | 5.70   | 0.8693 | 0.3755 |
| <b>CDE</b>         | 5.61   | 1 | 5.61   | 0.8565 | 0.3789 |
| <b>Lack of Fit</b> | 54.12  | 6 |        | 5.58   | 0.0932 |
| <b>Pure Error</b>  | 4.85   | 3 |        |        |        |

**Table S3:** Central composite design plan of experiments with factors glucose and  $K_2HPO_4$ , and the response polyol lipid titer and  $Y_{P/S}$ .

| <b>Run</b> | <b>Glucose</b> | <b><math>K_2HPO_4</math></b> | <b>Polyol lipid</b> | <b><math>Y_{P/S}</math></b> |
|------------|----------------|------------------------------|---------------------|-----------------------------|
|            | $g L^{-1}$     | $g L^{-1}$                   | $g L^{-1}$          | $g g^{-1}$                  |
| <b>1</b>   | 120.00         | 8.00                         | 24.80               | 0.21                        |
| <b>2</b>   | 300.00         | 1.40                         | 27.95               | 0.09                        |
| <b>3</b>   | 120.00         | 1.40                         | 29.80               | 0.25                        |
| <b>4</b>   | 210.00         | 4.70                         | 45.80               | 0.22                        |

|           |        |      |       |      |
|-----------|--------|------|-------|------|
| <b>5</b>  | 300.00 | 8.00 | 35.45 | 0.12 |
| <b>6</b>  | 210.00 | 4.70 | 45.70 | 0.22 |
| <b>7</b>  | 120.00 | 1.40 | 27.15 | 0.23 |
| <b>8</b>  | 300.00 | 1.40 | 30.75 | 0.10 |
| <b>9</b>  | 120.00 | 8.00 | 23.15 | 0.19 |
| <b>10</b> | 120.00 | 8.00 | 21.15 | 0.18 |
| <b>11</b> | 300.00 | 1.40 | 32.80 | 0.11 |
| <b>12</b> | 120.00 | 8.00 | 25.70 | 0.21 |
| <b>13</b> | 120.00 | 1.40 | 25.45 | 0.21 |
| <b>14</b> | 120.00 | 1.40 | 24.75 | 0.21 |
| <b>15</b> | 300.00 | 8.00 | 31.20 | 0.10 |
| <b>16</b> | 300.00 | 1.40 | 25.75 | 0.09 |
| <b>17</b> | 120.00 | 8.00 | 20.45 | 0.17 |
| <b>18</b> | 300.00 | 8.00 | 39.90 | 0.13 |
| <b>19</b> | 300.00 | 8.00 | 41.50 | 0.14 |
| <b>20</b> | 300.00 | 1.40 | 31.20 | 0.10 |
| <b>21</b> | 210.00 | 4.70 | 36.15 | 0.17 |
| <b>22</b> | 120.00 | 1.40 | 26.20 | 0.22 |
| <b>23</b> | 300.00 | 8.00 | 37.30 | 0.12 |
| <b>24</b> | 210.00 | 4.70 | 46.70 | 0.22 |
| <b>25</b> | 210.00 | 4.70 | 50.10 | 0.24 |
| <b>26</b> | 82.72  | 4.70 | 18.85 | 0.23 |
| <b>27</b> | 82.72  | 4.70 | 18.00 | 0.22 |
| <b>28</b> | 210.00 | 0.03 | 2.20  | 0.01 |
| <b>29</b> | 210.00 | 9.37 | 41.75 | 0.20 |
| <b>30</b> | 210.00 | 9.37 | 44.55 | 0.21 |
| <b>31</b> | 82.72  | 4.70 | 17.80 | 0.22 |
| <b>32</b> | 337.28 | 4.70 | 36.85 | 0.11 |
| <b>33</b> | 337.28 | 4.70 | 35.15 | 0.10 |

|           |        |      |       |      |
|-----------|--------|------|-------|------|
| <b>34</b> | 82.72  | 4.70 | 18.65 | 0.23 |
| <b>35</b> | 210.00 | 4.70 | 49.70 | 0.24 |
| <b>36</b> | 210.00 | 9.37 | 44.20 | 0.21 |
| <b>37</b> | 210.00 | 0.03 | 3.15  | 0.01 |
| <b>38</b> | 210.00 | 0.03 | 3.15  | 0.01 |
| <b>39</b> | 337.28 | 4.70 | 36.90 | 0.11 |
| <b>40</b> | 337.28 | 4.70 | 35.85 | 0.11 |
| <b>41</b> | 210.00 | 9.37 | 39.50 | 0.19 |
| <b>42</b> | 82.72  | 4.70 | 19.10 | 0.23 |
| <b>43</b> | 210.00 | 0.03 | 2.95  | 0.01 |
| <b>44</b> | 210.00 | 9.37 | 42.80 | 0.20 |
| <b>45</b> | 337.28 | 4.70 | 36.85 | 0.11 |
| <b>46</b> | 210.00 | 4.70 | 47.00 | 0.22 |
| <b>47</b> | 210.00 | 0.03 | 2.65  | 0.01 |
| <b>48</b> | 210.00 | 4.70 | 50.00 | 0.24 |
